# Supplementary material for: Synthesis of novel magnetic chitosan supported protonated peroxotungstate and its catalytic performance for oxidation
Source: Royal Society of Chemistry journal article supplement (doi:10.1039/c2nj40753a), 2012-01-01
Supplement: c2nj40753a.pdf [file c2nj40753a.pdf]

Table S1 XRF analyze of Fe<sub>3</sub>O<sub>4</sub>/CS/HWO MNPs and Fe<sub>3</sub>O<sub>4</sub>/CS/HWO after being used 5 times (w %)

| Items                          | Before | After | Items                          | Before | After |
|--------------------------------|--------|-------|--------------------------------|--------|-------|
| Fe <sub>2</sub> O <sub>3</sub> | 50.16  | 55.64 | Al <sub>2</sub> O <sub>3</sub> | 0.082  | 0.057 |
| WO <sub>3</sub>                | 47.54  | 42.75 | CaO                            | 0.063  | 0.038 |
| Na <sub>2</sub> O              | 1.24   | 0.91  | ZnO                            | 0.040  | 0.031 |
| P <sub>2</sub> O <sub>5</sub>  | 0.54   | 0.22  | PbO                            | 0.039  | 0.017 |
| Cl                             | 0.17   | 0.22  | Cr <sub>2</sub> O <sub>3</sub> | 0.015  | 0.014 |
| MnO                            | 0.12   | 0.10  |                                |        |       |

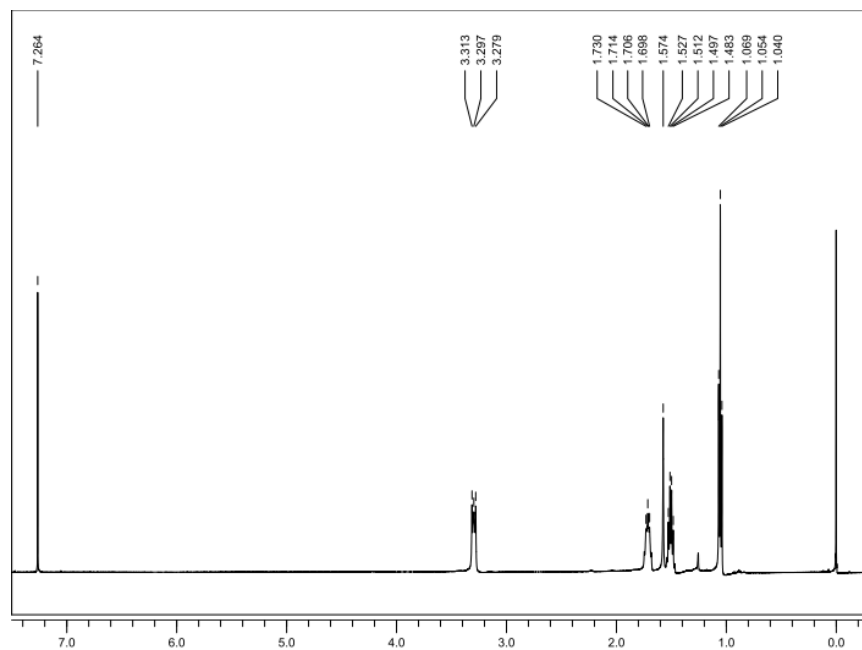

Figure S1 <sup>1</sup>H NMR (400 MHz, CDCl<sub>3</sub>) of TPA<sub>2</sub>[{WO(O<sub>2</sub>)<sub>2</sub>}<sub>2</sub>(μ-O)]

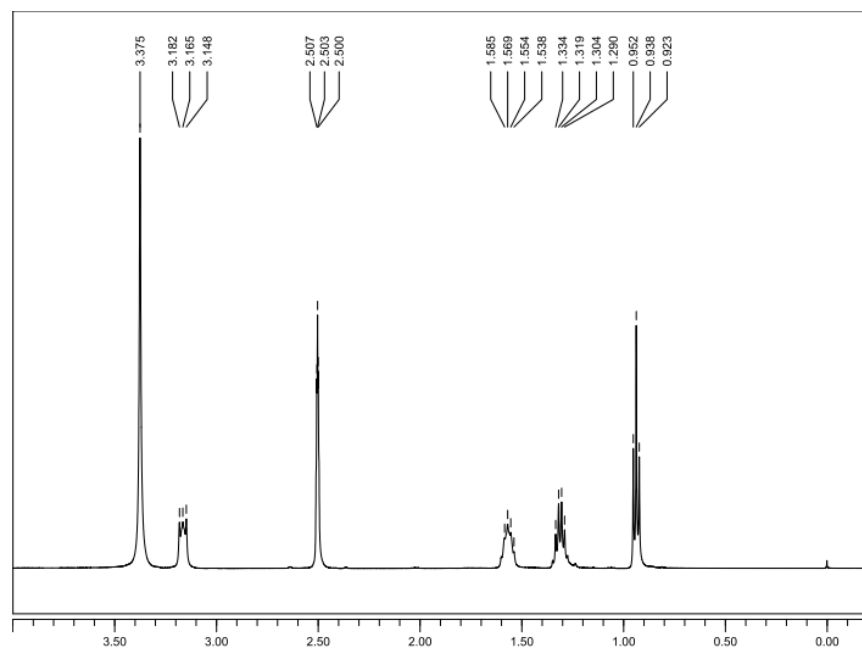

Figure S2 <sup>1</sup>H NMR (400 MHz, DMSO) of TBA<sub>3</sub>[H{W<sub>2</sub>O<sub>2</sub>(O<sub>2</sub>)<sub>2</sub>(μ-O)}<sub>2</sub>]

**Phenyl methyl sulfoxide:** <sup>1</sup>H NMR (400 MHz, CDCl<sub>3</sub>) δ 7.62-7.60 (m, 2 H), 7.51-7.44 (m, 3 H), 2.68 (s, 3

H);  $^{13}\text{C}$  NMR (100 MHz,  $\text{CDCl}_3$ )  $\delta$  145.55, 130.90, 129.22, 123.35, 43.80.

**Diphenyl sulfoxide:**  $^1\text{H}$  NMR (400 MHz,  $\text{CDCl}_3$ )  $\delta$  7.66-7.64 (m, 4 H), 7.49-7.42 (m, 6 H);  $^{13}\text{C}$  NMR (100 MHz,  $\text{CDCl}_3$ )  $\delta$  145.57, 131.03, 129.31, 124.76.

**Phenyl benzyl sulfoxide:**  $^1\text{H}$  NMR (300 MHz,  $\text{CDCl}_3$ )  $\delta$  3.96 (s, 2 H), 6.94-7.32 (m, 10 H);  $^{13}\text{C}$  NMR (75 MHz,  $\text{CDCl}_3$ )  $\delta$  63.5, 124.3, 128.2, 128.5, 128.8, 129.2, 130.3, 131.2, 142.6.

**Dibenzothiophene sulfoxide:**  $^1\text{H}$  NMR (400 MHz,  $\text{CDCl}_3$ )  $\delta$  7.99 (d,  $J = 7.6$  Hz, 2 H), 7.82 (d,  $J = 7.7$  Hz, 2 H), 7.61 (t,  $J = 7.5$  Hz, 3 H), 7.51 (t,  $J = 7.5$  Hz, 3 H);  $^{13}\text{C}$  NMR (100 MHz,  $\text{CDCl}_3$ )  $\delta$  145.18, 137.09, 132.53, 129.53, 127.53, 121.89.

**9-Oxa-bicyclo[6.1.0]nonane:**  $^1\text{H}$  NMR (300MHz,  $\text{CDCl}_3$ )  $\delta$  2.93-2.86 (m, 2 H), 2.17-2.12 (m, 2 H), 1.67-1.44 (m, 8 H), 1.34-1.21 (m, 2 H);  $^{13}\text{C}$  NMR (75 MHz,  $\text{CDCl}_3$ )  $\delta$  55.61, 26.55, 26.29, 25.60.

**2-Hexyloxirane:**  $^1\text{H}$  NMR (300MHz,  $\text{CDCl}_3$ )  $\delta$  2.93-2.88 (m, 1 H), 2.74 (t,  $J = 5.0$  Hz, 1 H), 2.46 (dd,  $J = 5.0$  Hz, 2.7 Hz, 1 H), 1.57-1.30 (m, 10 H), 0.89 (t,  $J = 6.8$  Hz, 3 H);  $^{13}\text{C}$  NMR (75 MHz,  $\text{CDCl}_3$ )  $\delta$  52.44, 47.15, 32.56, 31.82, 29.17, 25.99, 14.10.

**2-methyl-3-pentyloxirane:**  $^1\text{H}$  NMR (300MHz,  $\text{CDCl}_3$ )  $\delta$  2.73 (qd,  $J = 5.4$  Hz, 5.2 Hz, 1 H), 2.62 (td,  $J = 5.4$  Hz, 2.2 Hz, 1H), 1.55-1.25 (m, 11 H), 0.9 (t,  $J = 6.8$  Hz, 3 H);  $^{13}\text{C}$  NMR (75 MHz,  $\text{CDCl}_3$ )  $\delta$  59.86, 54.59, 32.10, 31.74, 25.78, 22.67, 17.73, 14.03.

**2,3-epoxy-3-phenyl-propan-1-ol.**  $^1\text{H}$  NMR (400 MHz,  $\text{CDCl}_3$ )  $\delta$  1.98-2.20 (m, 1 H), 3.22 (dt,  $J = 3.8$  and 2.2 Hz, 1 H), 3.76-3.83 (m, 1 H), 3.92 (d,  $J = 2.2$  Hz, 1 H), 4.01-4.07 (m, 1 H), 7.20-7.40 (m, 5 H); ;  $^{13}\text{C}$  NMR (100 MHz,  $\text{CDCl}_3$ )  $\delta$  136.8, 128.6, 128.4, 125.9, 62.7, 61.5, 55.8.

**Nitrosobenzene:** MS (70 eV, EI): 108, 107 [ $\text{M}^+$ ], 93, 78, 77, 74, 51, 50.
